# Supplementary material for: An Aqueous Process for Preparing Flexible Transparent Electrodes Using Non-Oxidized Graphene/Single-Walled Carbon Nanotube Hybrid Solution
Source: MDPI journal article supplement (doi:10.3390/nano13152249), 2023-08-03
Supplement: s1 [file s1]

## SUPPLEMENTARY INFORMATION

### An aqueous process to flexible transparent electrodes using non-oxidized graphene and SWNT hybrid solution

Min Jae Oh,<sup>1,†</sup> Gi-Cheol Son,<sup>2,†</sup> Minkook kim,<sup>1</sup> Junyoung Jeon,<sup>1</sup> Yong Hyun Kim,<sup>1</sup> Myungwoo Son<sup>1,\*</sup>

<sup>1</sup>Artificial Intelligence & Energy Research Center, Korea Photonics Technology Institute (KOPTI), Gwangju 61007, Republic of Korea

<sup>2</sup>School of Materials Science and Engineering, Gwangju Institute of Science & Technology (GIST), Gwangju 61005, Republic of Korea

\*e-mail: mwson@kopti.re.kr

Keywords: flexible transparent electrode, non-oxidized graphene, single-walled carbon nanotube, aqueous solution, transparent thin film transistor

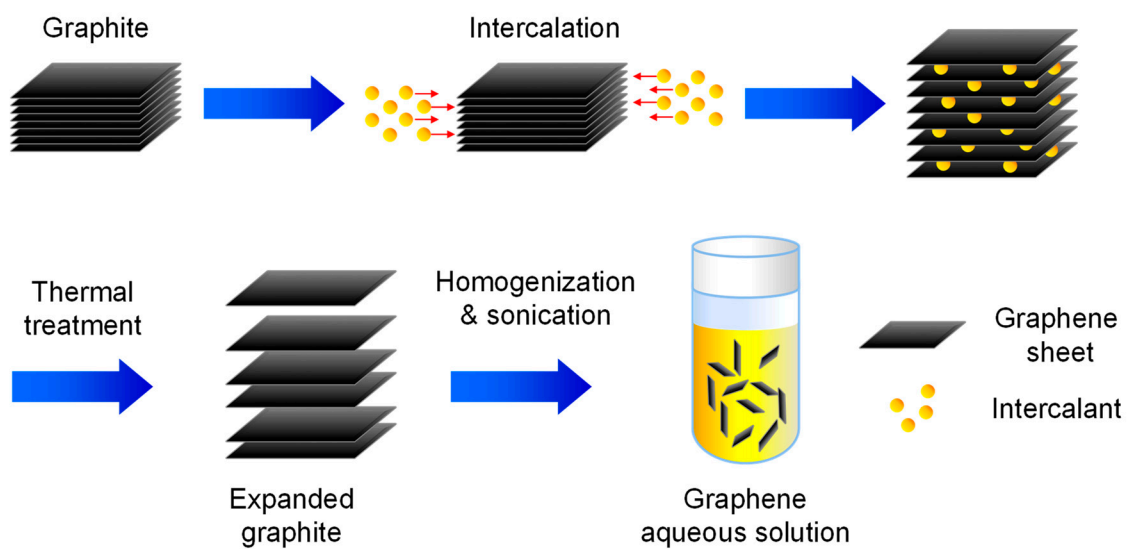

**Figure S1.** Schematic illustration showing the sequential procedures for preparing non-oxidized graphene aqueous solution using halogen intercalation method.

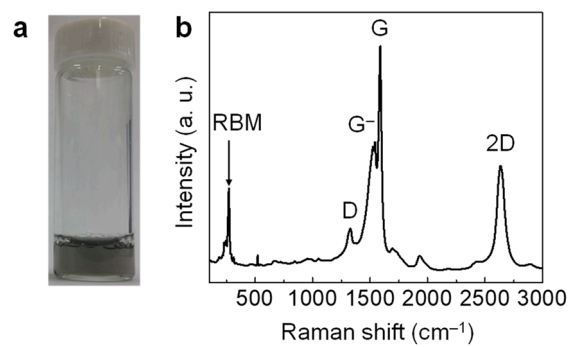

**Figure S2.** (a) Photograph of aqueous SWNT solution and (b) Raman spectrum of SWNT film.

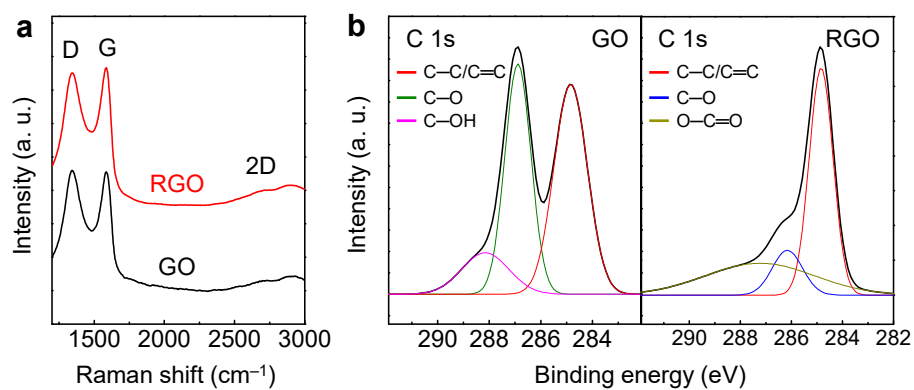

**Figure S3.** (a) Raman spectra and (b) XPS spectra of GO and RGO synthesized by Hummers' method.

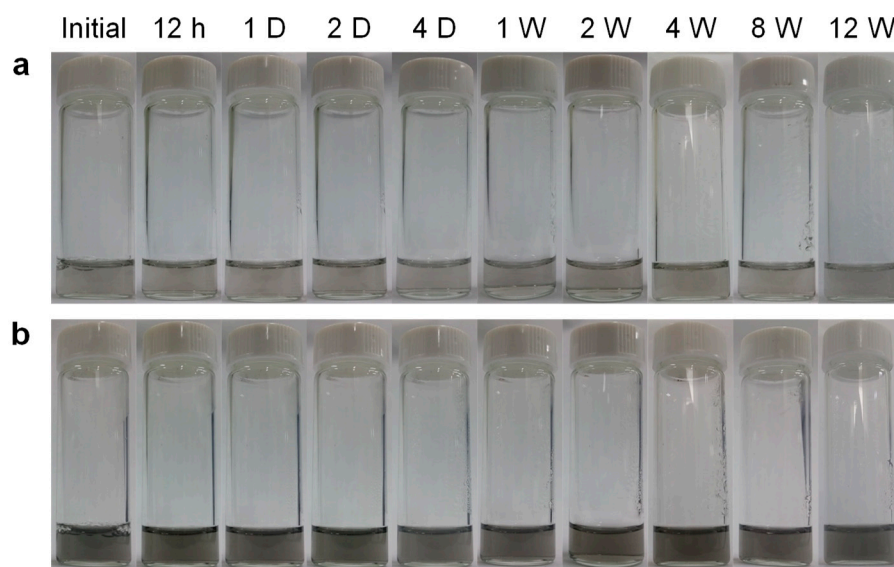

**Figure S4.** Photographs of (a) non-oxidized graphene and (b) aqueous SWNT solutions showing the dispersion stability.

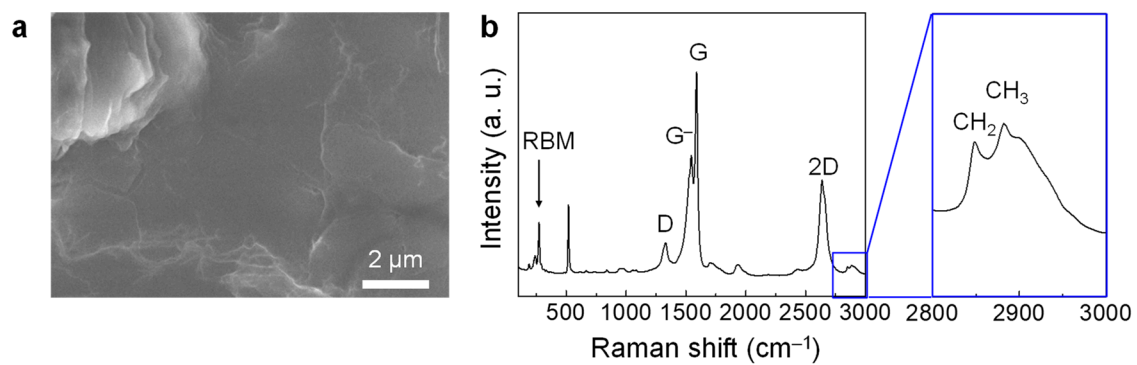

**Figure S5.** (a) SEM image and Raman spectrum of as-prepared non-oxidized hybrid graphene/SWNT film without removal of SDS surfactant.

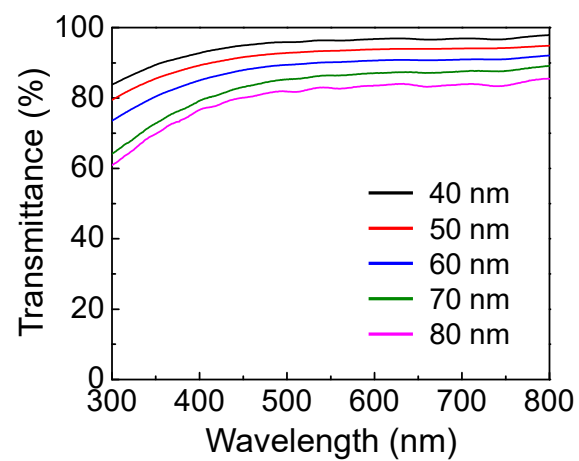

**Figure S6.** (a) Optical transmittance at 550 nm for 30 wt.% graphene contained hybrid electrodes with various film thickness.

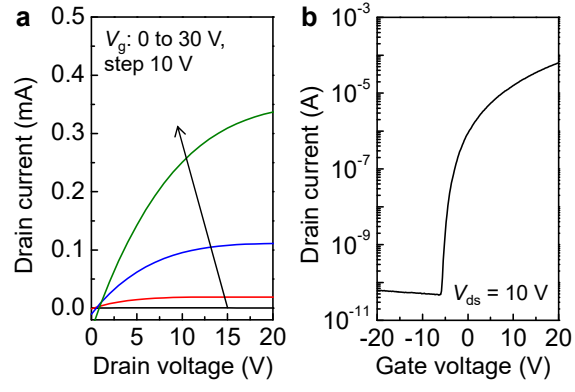

**Figure S7.** (a)  $I_{ds}$ - $V_{ds}$  and (b)  $I_{ds}$ - $V_g$  curves of IGZO TFTs with Al source and drain electrodes.
